# Supplementary material
Source: PubMed Central journal article supplement (PMC2729544)
Supplement: NIHMS104370-supplement-01.pdf [file NIHMS104370-supplement-01.pdf]

## **Supplemental Figure**

Flow-chart of Resident-Based Acute Stroke Protocol

Type of file: figure

Label: 2

Filename: Flow Chart of Resident-Based Acute Stroke Protocol.tiff

EMS responds to acute stroke patient in the field *or* acute stroke patient “walks in” to the ED via patient’s own transportation

ED Triage/Communication Nurse

- Stroke pager is activated
- Alpha-numeric text message is sent to the stroke team including the estimated time of onset and a brief description of deficits

Stroke pager simultaneously notifies junior and senior neurology residents, ED residents, Stroke and ED Attendings

In-house junior neurology residents, ED residents, and ED staff respond, working in parallel

- Exact time of onset recorded
- Stat head CT and blood work ordered
- Important past medical history obtained
- NIHSS performed

Junior neurology resident discusses case with senior neurology resident, reviews labs, and CT results.

Junior neurology resident executes decision. If questions remain, the senior neurology resident has the option of calling the on-call stroke attending.
